# Supplementary material
Source: PubMed Central journal article supplement (PMC5033863)
Supplement: jciinsight-1-86014-s001.pdf [file jciinsight-1-86014-s001.pdf]

Supplemental Figures

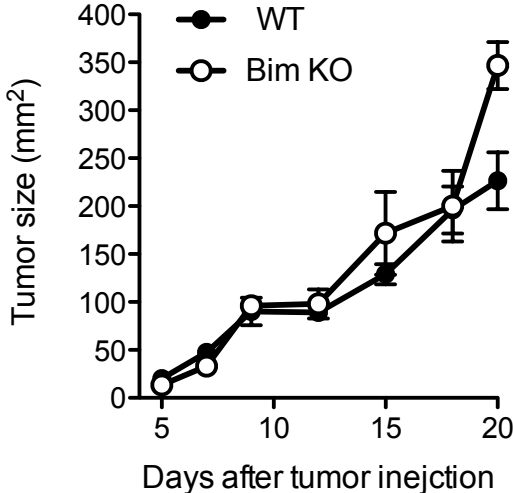

Figure S1: **Tumor growth in WT and Bim KO mice.** B16 melanoma tumor cells were injected s.c. in wild type and Bim KO mice. The tumor size were measured with a caliper and shown as square millimeter.

**Supplemental Figures**

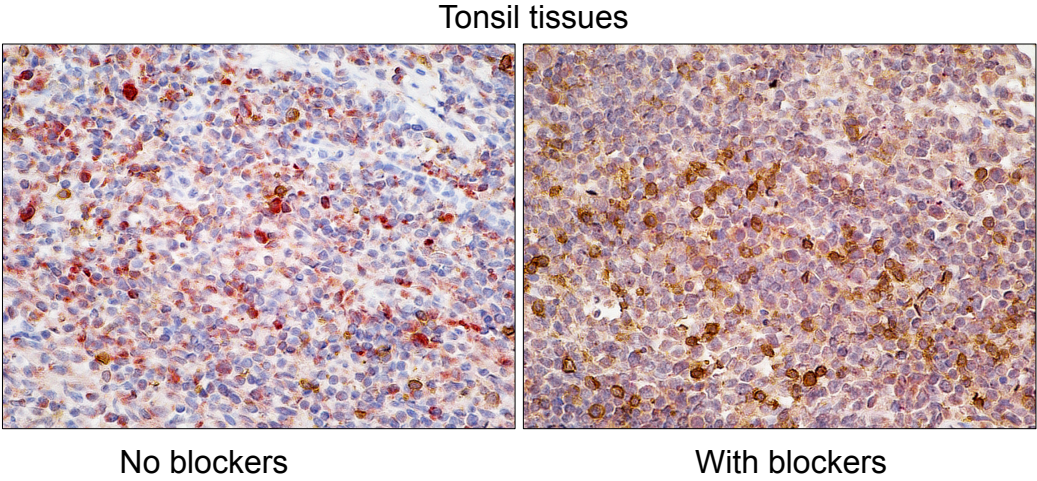

Figure S2: **Blocking of Bim staining in human tonsil.** Human tonsils were stained with anti-Bim (Red) and anti-PD-1 (Brown) with or without blockers for Bim. The blockers were recombinant human Bim proteins (#1325-BL-050, R&D Systems) that was pre-mixed with anti-Bim antibody before staining for 20 min.

Supplemental Figures

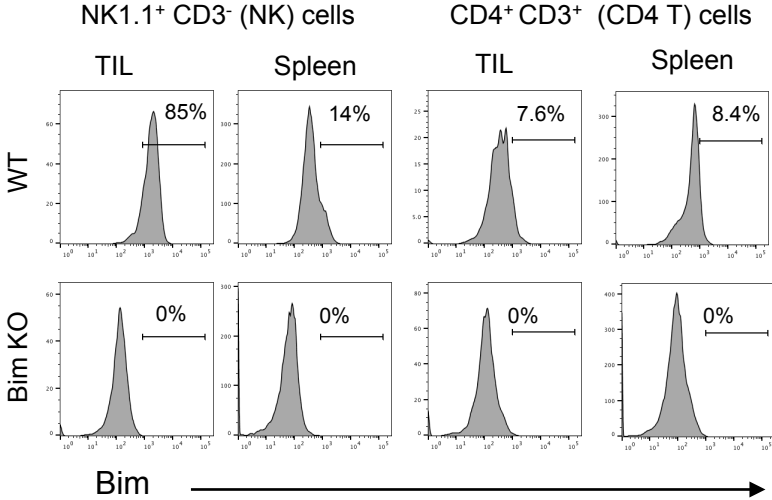

Figure S3: **Bim expressed by NK and CD4 T cells within tumors and spleen.** Tumor infiltrating lymphocytes (TIL) and spleen cells were isolated from WT or Bim KO mice bearing B16 tumors. Following cell surface staining of markers for NK cell and CD4 T cells as indicated, cells were stained for intracellular expression of Bim. One of three experiments was shown.

## Supplemental Figures

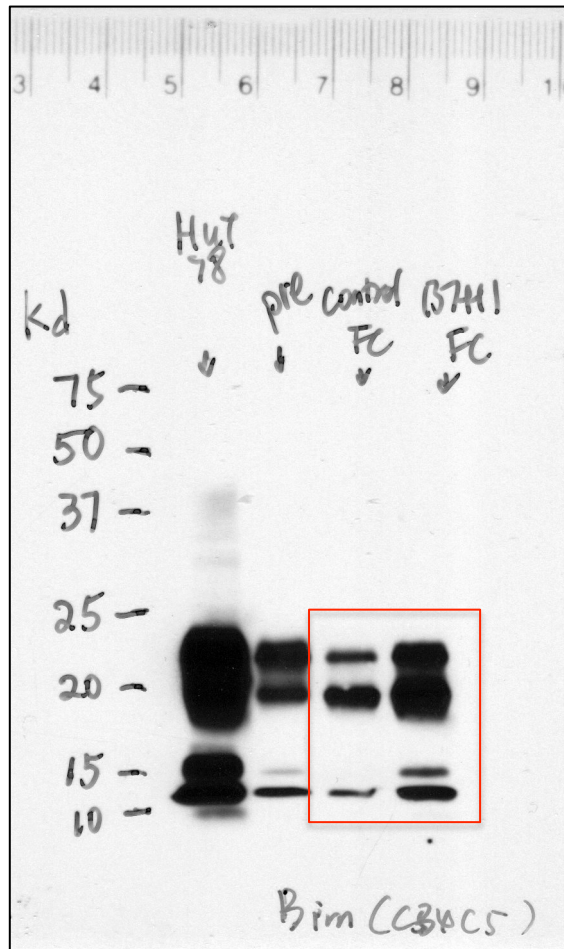

Figure S4: **Full unedited gel for Figure 5B.** Boxed area is correspond to those shown in the cropped images within the Figure 5B. CD8<sup>+</sup> T cells isolated from PBMC activated with PHA-L for 48 hours and then incubated with control fusion protein or human B7-H1 (PD-L1) fusion protein in the presence of anti-CD3 for another 24 hours before Western blotting assay. Control groups including Hut78 lymphoma cell line for Bim positive control. Purified activated CD8<sup>+</sup> T cells before incubation with B7-H1 protein was used as baseline control (pre).

**Supplemental table 1** Baseline patient characteristics by disease status at 12 weeks

| Characteristic                                   | Total<br>N=13 | Responders<br>(CR/PR/<br>N=6 | Progressors<br>N=7 |
|--------------------------------------------------|---------------|------------------------------|--------------------|
| Median age (range)                               | 63 (46-80)    | 65.5 (46-80)                 | 63 (52-74)         |
| Gender-male (N, %)                               | 7 (54)        | 4 (67)                       | 3 (43)             |
| Median # of previous systemic treatments (range) | 2 (1-6)       | 2 (1-6)                      | 3 (1-4)            |
| Previous treatment (N, %)                        |               |                              |                    |
| Ipilimumab                                       | 13 (100)      | 6 (100)                      | 7 (100)            |
| Chemotherapy                                     | 6 (46)        | 3 (50)                       | 3 (43)             |
| Targeted therapy                                 | 4 (31)        | 2 (33)                       | 2 (29)             |
| Other immunotherapy                              | 4 (31)        | 2 (33)                       | 2 (29)             |
| LDH > ULN (N; %)                                 | 7 (54)        | 2 (33)                       | 5 (71)             |
| M1c disease (N; %)                               | 13 (100)      | 6 (100)                      | 7 (100)            |
| BRAF status (N; %)                               |               |                              |                    |
| Mutant                                           | 4 (31)        | 2 (33)                       | 2 (29)             |
| Wild type                                        | 7 (54)        | 3 (50)                       | 4 (57)             |
| Unknown                                          | 2 (15)        | 1 (17)                       | 1 (14)             |

CR: Complete response; PR: Partially response; SD: Stable disease.

Note: Percentages in parenthesis correspond to column subgroups.

**Supplemental table 2** Baseline and 12-week percent change in the frequency of Bim<sup>+</sup> per PD-1<sup>+</sup> CD11a<sup>high</sup> CD8<sup>+</sup> T cells and Bim MFI<sup>‡</sup>

|                                                                                                                                                     | Responders<br>(CR/PR)          | Progressors                     | P value |
|-----------------------------------------------------------------------------------------------------------------------------------------------------|--------------------------------|---------------------------------|---------|
| Median baseline %Bim <sup>+</sup> /PD1 <sup>+</sup> CD11a <sup>high</sup> CD8 <sup>+</sup> T cells (interquartile range); n                         | 56.95 (49.52-72.25);<br>n=6    | 33.30 (27.82-49.82; 22);<br>n=7 | 0.0047* |
| Median baseline Bim MFI (interquartile range); n                                                                                                    | 59.75 (32.5-84.1); n=6         | 17.00 (11.7-39.8); n=7          | 0.0350* |
| Median 12-week % change in %Bim <sup>+</sup> /PD1 <sup>+</sup> CD11a <sup>high</sup> CD8 <sup>+</sup> T cells (interquartile range; N)              | -49.26 (-72.97; -27.39)<br>n=6 | 23.72 (-4.68; 47.94) n=7        | 0.0047* |
| Median 12-week % change in Bim MFI (interquartile range; N)                                                                                         | -33.79 (-71.87; 8.19); n=6     | 30.63 (-62.31; 52.94); n=7      | 0.2949  |
| Median 12-week % change in %Bim <sup>+</sup> /PD1 <sup>+</sup> CD11a <sup>high</sup> CD8 <sup>+</sup> T cells (interquartile range; N) <sup>‡</sup> | -32.58 (-55.29; 37.50);<br>n=6 | -57.72 (-68.21; -54.52);<br>n=7 | 0.1014  |

<sup>‡</sup> Includes only patients with objective response (CR/PR) versus patients with progression at 12 weeks for whom baseline and 12-week samples were available.

\*Statistically significant.
